# Supplementary material
Source: PubMed Central journal article supplement (PMC7585927)
Supplement: JCB889089_Supplemetal_Material.pdf [file JCB889089_Supplemetal_Material.pdf]

## **Online Supplement**

**OS Table 1.** Tabulation of assessments collected per individual participant.

| <i>PARTICIPANT</i>                 | NVC TEST  |           |           |           | MODIFIED DUFFIN CO <sub>2</sub> REBREATHE TEST |           |           |           | INCREMENTAL EXERCISE TEST |           |           |           |
|------------------------------------|-----------|-----------|-----------|-----------|------------------------------------------------|-----------|-----------|-----------|---------------------------|-----------|-----------|-----------|
|                                    | NP        | TM1       | TM2       | TM3       | NP                                             | TM1       | TM2       | TM3       | NP                        | TM1       | TM2       | TM3       |
| 1                                  |           | •         | •         | •         | •                                              | •         | •         | •         | •                         | •         | •         | •         |
| 2                                  | •         | •         | •         | •         | •                                              | •         | •         | •         | •                         | •         | •         | •         |
| 3                                  | •         |           |           |           | •                                              |           |           |           | •                         |           |           |           |
| 4                                  |           |           |           |           | •                                              |           |           |           |                           |           |           |           |
| 5                                  |           |           |           | •         | •                                              |           |           | •         |                           |           |           |           |
| 6                                  |           |           |           |           | •                                              |           |           |           | •                         |           |           |           |
| 7                                  |           |           |           |           | •                                              |           |           |           | •                         |           |           |           |
| 8                                  | •         |           |           |           |                                                |           |           |           |                           |           |           |           |
| 9                                  | •         |           |           |           | •                                              |           |           |           | •                         |           |           |           |
| 10                                 | •         |           | •         |           | •                                              |           | •         |           | •                         |           | •         |           |
| 11                                 | •         |           |           |           | •                                              |           |           |           | •                         |           |           |           |
| 12                                 | •         |           |           |           | •                                              |           |           |           | •                         |           |           |           |
| 13                                 |           |           |           | •         |                                                |           |           | •         |                           |           |           |           |
| 14                                 | •         |           |           |           | •                                              |           |           |           | •                         |           |           |           |
| 15                                 | •         |           |           |           | •                                              |           |           |           | •                         |           |           |           |
| 16                                 | •         |           |           |           | •                                              |           |           |           | •                         |           |           |           |
| 17                                 | •         |           |           |           | •                                              |           |           |           | •                         |           |           |           |
| 18                                 |           |           |           |           | •                                              |           |           |           | •                         |           |           |           |
| 19                                 | •         |           |           |           | •                                              |           |           |           | •                         |           |           |           |
| 20                                 |           | •         | •         | •         |                                                | •         | •         | •         |                           |           | •         | •         |
| 21                                 | •         |           |           |           |                                                |           |           |           | •                         |           |           |           |
| 22                                 |           | •         |           |           |                                                | •         |           |           |                           | •         |           |           |
| 23                                 |           |           | •         |           |                                                |           | •         |           |                           |           | •         |           |
| 24                                 |           |           | •         |           |                                                |           | •         |           |                           |           | •         |           |
| 25                                 | •         |           |           |           | •                                              |           |           |           | •                         |           |           |           |
| 26                                 | •         |           |           |           | •                                              |           |           |           | •                         |           |           |           |
| 27                                 |           | •         | •         | •         |                                                | •         | •         | •         |                           | •         | •         | •         |
| 28                                 | •         |           |           |           | •                                              |           |           |           | •                         |           |           |           |
| 29                                 |           | •         | •         |           |                                                | •         |           | •         |                           |           | •         | •         |
| 30                                 |           |           | •         |           |                                                |           |           |           |                           |           |           |           |
| 31                                 |           | •         | •         | •         |                                                | •         | •         | •         |                           |           | •         | •         |
| 32                                 |           |           | •         |           |                                                |           | •         |           |                           |           | •         |           |
| 33                                 |           |           | •         | •         |                                                |           | •         | •         |                           |           | •         | •         |
| 34                                 |           |           |           |           | •                                              |           |           | •         | •                         |           |           | •         |
| 35                                 |           |           |           | •         |                                                |           |           | •         |                           |           |           | •         |
| 36                                 | •         |           | •         | •         | •                                              | •         | •         | •         | •                         | •         | •         | •         |
| 37                                 | •         |           |           |           |                                                |           |           |           | •                         |           |           |           |
| 38                                 |           | •         | •         | •         |                                                | •         | •         | •         |                           | •         | •         | •         |
| 39                                 |           | •         | •         | •         |                                                | •         | •         | •         |                           | •         | •         | •         |
| 40                                 |           |           | •         | •         |                                                |           | •         | •         |                           |           |           |           |
| 41                                 |           | •         | •         | •         |                                                | •         | •         | •         |                           | •         |           |           |
| 42                                 |           |           | •         |           |                                                |           | •         | •         |                           |           | •         | •         |
| 43                                 | •         |           |           |           | •                                              |           |           |           | •                         |           |           |           |
| 44                                 |           | •         | •         | •         |                                                | •         | •         | •         |                           | •         | •         | •         |
| 45                                 |           |           | •         | •         |                                                |           | •         | •         |                           |           | •         | •         |
| 46                                 |           |           | •         | •         |                                                |           | •         | •         |                           |           | •         | •         |
| 47                                 |           | •         |           |           |                                                | •         |           |           |                           | •         |           |           |
| <b>TOTAL NUMBER OF ASSESSMENTS</b> | <b>19</b> | <b>12</b> | <b>21</b> | <b>17</b> | <b>25</b>                                      | <b>13</b> | <b>19</b> | <b>20</b> | <b>23</b>                 | <b>10</b> | <b>18</b> | <b>16</b> |

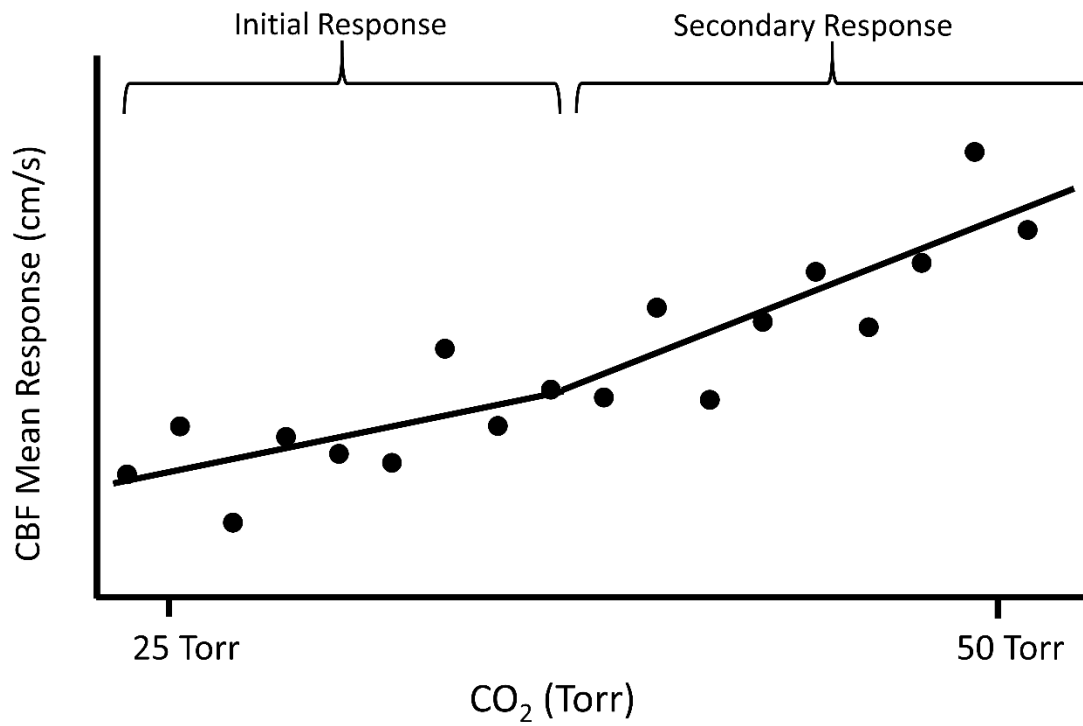

**OS Figure 1.** The response of mean cerebral blood flow (CBF) to the increase in CO<sub>2</sub> (Torr) during the modified Duffin hyperoxic rebreath test. The slope of the initial response was measured and then compared between participants.

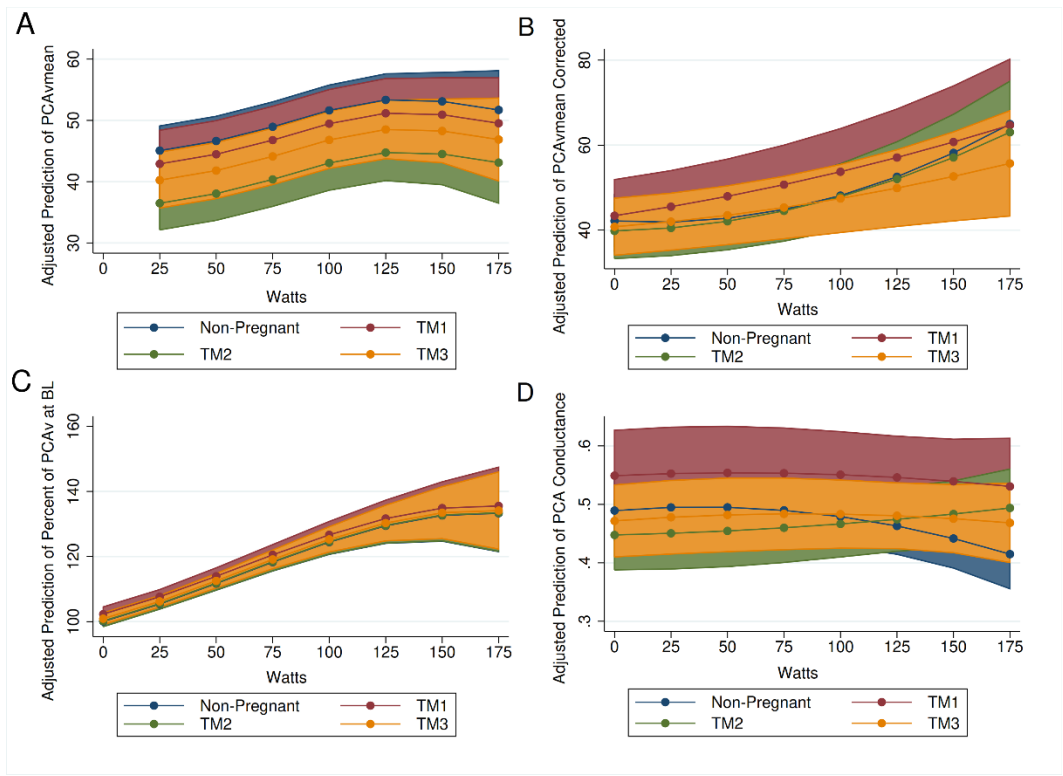

**OS Figure 2.** PCA during incremental exercise to volitional fatigue. TM1, trimester 1; TM2, trimester 2; TM3; trimester 3.

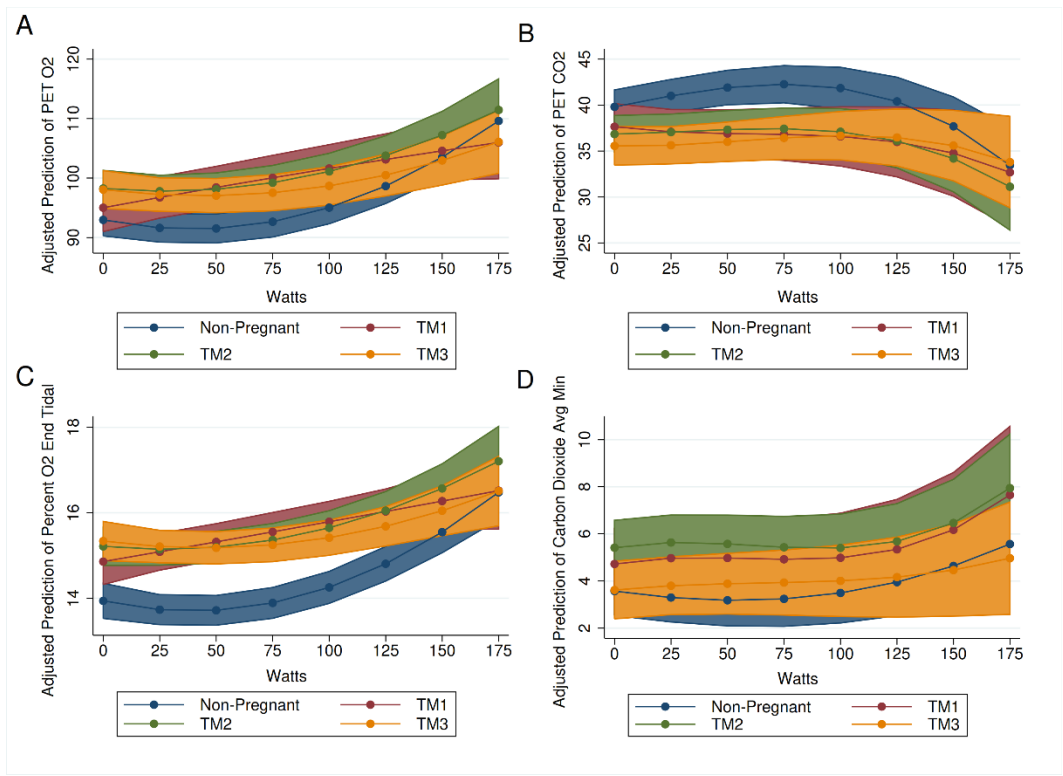

**OS Figure 3.** Respiratory outcomes during incremental exercise to volitional fatigue. TM1, trimester 1; TM2, trimester 2; TM3; trimester 3.

**OS Table 2.** Non-CBF variables from exercise test.

| Variable                          | Constant term              | TM1                       | TM2                        | TM3                       | Significant Interaction with Time Component |
|-----------------------------------|----------------------------|---------------------------|----------------------------|---------------------------|---------------------------------------------|
| Systolic BP (mm Hg)               | 116.66<br>(113.42, 119.91) | -2.67<br>(-8.35, 3.02)    | -11.33‡<br>(-16.16, -6.49) | -7.46†<br>(-12.37, -2.56) | TM3                                         |
| Diastolic BP (mm Hg)              | 74.26<br>(71.65, 76.87)    | -6.13*<br>(-10.77, -1.48) | -8.17‡<br>(-12.11, -4.23)  | -6.16†<br>(-10.16, -2.16) | TM2 TM3                                     |
| MAP (mm Hg)                       | 91.23<br>(88.53, 93.93)    | -3.63<br>(-8.25, 0.99)    | -10.67‡<br>(-14.59, -6.75) | -8.18‡<br>(-12.16, -4.20) |                                             |
| CO Mean                           | 5.88<br>(5.08, 6.67)       | 0.99<br>(-0.41, 2.40)     | 0.81<br>(-0.39, 2.01)      | 1.71†<br>(0.49, 2.92)     | TM1                                         |
| P <sub>ET</sub> O <sub>2</sub>    | 92.97<br>(90.27, 95.66)    | 2.05<br>(-2.64, 6.73)     | 5.29†<br>(1.39, 9.19)      | 5.09*<br>(1.09, 9.10)     | TM1                                         |
| P <sub>ET</sub> CO <sub>2</sub>   | 39.81<br>(37.97, 41.65)    | -2.16<br>(-5.02, 0.69)    | -2.96*<br>(-5.42, -0.51)   | -4.25†<br>(-6.75, -1.75)  | TM1 TM2 TM3                                 |
| Respiratory Rate                  | 18.91<br>(17.59, 20.23)    | -0.87<br>(-2.92, 1.19)    | -1.20<br>(-2.97, 0.58)     | -0.58<br>(-2.38, 1.23)    | TM1 TM2                                     |
| Tidal Volume                      | 0.82<br>(0.71, 0.93)       | 0.03<br>(-0.14, 0.21)     | 0.07<br>(-0.07, 0.22)      | 0.12<br>(-0.02, 0.27)     |                                             |
| Min Ve Mean V                     | 15.76<br>(13.17, 18.35)    | -1.22<br>(-5.43, 2.98)    | -0.71<br>(-4.29, 2.87)     | 0.44<br>(-3.18, 4.06)     | TM1 TM2 TM3                                 |
| Oxygen Avg Max                    | 140.86<br>(139.05, 142.68) | -0.39<br>(-3.65, 2.87)    | 0.15<br>(-2.56, 2.86)      | 2.35<br>(-0.45, 5.15)     |                                             |
| CO <sub>2</sub> Avg Max           | 3.57<br>(2.54, 4.61)       | 1.15<br>(-0.63, 2.93)     | 1.84*<br>(0.35, 3.34)      | 0.05<br>(-1.49, 1.58)     | TM1 TM2 TM3                                 |
| Percent O <sub>2</sub> End Tidal  | 13.94<br>(13.53, 14.35)    | 0.92†<br>(0.34, 1.50)     | 1.27‡<br>(0.77, 1.78)      | 1.40‡<br>(0.89, 1.91)     | TM1                                         |
| Percent CO <sub>2</sub> End Tidal | 6.01<br>(5.74, 6.28)       | -0.25<br>(-0.68, 0.18)    | -0.34<br>(-0.71, 0.02)     | -0.54†<br>(-0.91, -0.16)  | TM1 TM2 TM3                                 |
| Percent O <sub>2</sub> inspired   | 20.69<br>(20.48, 20.91)    | -0.42*<br>(-0.81, -0.04)  | -0.43†<br>(-0.75, -0.11)   | -0.20<br>(-0.53, 0.14)    |                                             |
| Percent CO <sub>2</sub> inspired  | 0.50<br>(0.35, 0.65)       | 0.19<br>(-0.06, 0.44)     | 0.30†<br>(0.09, 0.51)      | 0.04<br>(-0.18, 0.26)     |                                             |
| VO <sub>2</sub>                   | 1.06<br>(0.85, 1.27)       | -0.30*<br>(-0.59, -0.01)  | -0.32*<br>(-0.57, -0.06)   | -0.16<br>(-0.42, 0.09)    |                                             |
| VCO <sub>2</sub>                  | 0.81<br>(0.67, 0.95)       | -0.02<br>(-0.22, 0.18)    | -0.09<br>(-0.26, 0.08)     | -0.03<br>(-0.20, 0.15)    |                                             |
| RER                               | 0.86<br>(0.83, 0.90)       | 0.07†<br>(0.01, 0.13)     | 0.08‡<br>(0.03, 0.13)      | 0.05‡<br>(0.0002, 0.10)   | TM1                                         |
| HR                                | 71.94<br>(68.20, 75.67)    | 8.68‡<br>(4.57, 12.79)    | 9.45‡<br>(5.81, 13.09)     | 14.64‡<br>(10.98, 18.31)  | TM1 TM2 TM3                                 |

**Notes:** Multilevel model adjusted for random intercept at the participant and (nested) participant x phase of pregnancy levels. Data are presented as adjusted means (for reference term),  $\beta$  coefficients, and 95% Confidence Intervals. Analyses were adjusted for clustering by participant. BP, blood pressure; MCA, middle cerebral artery; NP, nonpregnant; TM1, first trimester; TM2, second trimester; TM3, third trimester; PCA, posterior cerebral artery.

\* Significant difference vs NP ( $p < 0.05$ ).

† Significant difference vs NP ( $p < 0.01$ ).

‡ Significant difference vs NP ( $p < 0.001$ ).
